# Supplementary material for: Prediction and attenuation of seasonal spillover of parasites between wild and domestic ungulates in an arid mixed‐use system
Source: PubMed Central journal article supplement (PMC6032883; doi:10.1111/1365-2664.13083), 2018-01-28
Supplement: JPE-55-1976-s002.pdf [file JPE-55-1976-s002.pdf]

*Appendix S2: Supplementary Results, Tables  
S1-S3, and Figures S1-S3*

**Prediction and attenuation of seasonal  
spillover of parasites between wild and  
domestic ungulates in an arid mixed-use  
system**

**Josephine G. Walker<sup>1,2,3,4,\*</sup>, Kate Evans<sup>1,3</sup>,  
Hannah Rose Vineer<sup>2,5</sup>, Jan A. van Wyk<sup>6</sup>,  
& Eric R. Morgan<sup>2,7</sup>**

1. *School of Biological Sciences, University of Bristol, Life Sciences Building, 24 Tyndall Avenue, Bristol, BS8 1TQ, UK*
2. *Cabot Institute, University of Bristol, BS8 1UJ, UK*
3. *Elephants for Africa, Maun, Botswana*
4. *Population Health Sciences, Bristol Medical School, University of Bristol, Oakfield House, Oakfield Grove, Bristol, BS8 2BN, UK*
5. *School of Veterinary Sciences, University of Bristol, Langford House, Langford, North Somerset, BS40 5DU, UK*
6. *Department of Veterinary Tropical Diseases, Faculty of Veterinary Science, University of Pretoria, Private Bag X04, 0110, Onderstepoort, South Africa*
7. *Institute for Global Food Security, Queen's University Belfast, University Road, Belfast, BT7 1NN, UK*

\*Correspondence author. [j.g.walker@bristol.ac.uk](mailto:j.g.walker@bristol.ac.uk)

## Supplementary Results

### MIGRATORY HOSTS AND PARASITE MOVEMENT

In the simulations, migratory hosts carried parasites acquired in one part of their range into the other (Fig. S3). Under a scenario with no migration, if a secondary host had the same density and establishment rate as the primary host, both hosts contributed in equal proportions to the total worm burden. When migration occurred, a proportion of the worms present in one location at a given time were acquired by migratory hosts in the other location (Table S3). Under the fixed-month migration scenario, there was a net movement of worms from east (wet season range) to west (dry season range). Under the precipitation-driven migration scenario, the pattern varied year to year (Fig. S3); in this scenario migratory hosts spent more time in the east (wet season range) than the west, contributing a large proportion of the overall burden on that side, while for both locations only about 7% of the burden came from the distant location. These results were generally robust to shorter (14 days) or longer (100 days) lifespans of the worm.

## Supplementary Tables

**Table S1** Percentage of farmers reporting shared water (W) or pasture (P) between wild and domestic ungulate species, by village (Questionnaire sample size). Only zebra, impala, wildebeest, buffalo, and elephants were provided as options on the survey, other species were suggested by interviewees.

|                             |                  | Gweta (8) |     | Khumaga (11) |    | Moreomaoto (11) |    | Phuduhudu (33) |    |
|-----------------------------|------------------|-----------|-----|--------------|----|-----------------|----|----------------|----|
| Species                     |                  | W         | P   | W            | P  | W               | P  | W              | P  |
| Cattle                      | Cape Buffalo     | 13        | 0   | 0            | 0  | 0               | 0  | 6              | 12 |
|                             | African Elephant | 63        | 100 | 91           | 82 | 55              | 55 | 30             | 58 |
|                             | Impala           | 38        | 50  | 64           | 45 | 9               | 0  | 9              | 21 |
|                             | Blue Wildebeest  | 63        | 75  | 82           | 82 | 18              | 0  | 36             | 61 |
|                             | Plains Zebra     | 63        | 75  | 82           | 82 | 27              | 0  | 36             | 58 |
|                             | Duiker           | 0         | 13  | 9            | 0  | 0               | 0  | 0              | 3  |
|                             | Giraffe          | 0         | 0   | 0            | 0  | 0               | 0  | 3              | 9  |
|                             | Greater Kudu     | 13        | 50  | 18           | 9  | 0               | 0  | 9              | 3  |
|                             | Steenbok         | 0         | 13  | 9            | 0  | 0               | 0  | 0              | 0  |
|                             | Warthog          | 0         | 13  | 0            | 0  | 0               | 0  | 0              | 0  |
| Goats<br>&<br>Sheep         | Cape Buffalo     | 13        | 0   | 0            | 0  | 0               | 0  | 9              | 18 |
|                             | African Elephant | 63        | 88  | 82           | 64 | 91              | 82 | 45             | 61 |
|                             | Impala           | 38        | 50  | 64           | 45 | 36              | 0  | 15             | 36 |
|                             | Blue Wildebeest  | 63        | 63  | 64           | 45 | 45              | 0  | 45             | 64 |
|                             | Plains Zebra     | 63        | 75  | 73           | 55 | 55              | 9  | 48             | 73 |
|                             | Duiker           | 0         | 13  | 9            | 9  | 0               | 9  | 0              | 3  |
|                             | Giraffe          | 0         | 0   | 0            | 0  | 0               | 0  | 6              | 9  |
|                             | Greater Kudu     | 13        | 50  | 27           | 9  | 0               | 0  | 12             | 6  |
|                             | Steenbok         | 0         | 13  | 9            | 9  | 0               | 0  | 0              | 0  |
|                             | Warthog          | 0         | 13  | 0            | 0  | 0               | 0  | 0              | 0  |
| Horses<br>&<br>Don-<br>keys | Cape Buffalo     | 13        | 13  | 0            | 0  | 0               | 0  | 6              | 6  |
|                             | African Elephant | 50        | 63  | 82           | 82 | 45              | 18 | 27             | 30 |
|                             | Impala           | 25        | 25  | 64           | 27 | 18              | 0  | 9              | 18 |
|                             | Blue Wildebeest  | 50        | 50  | 64           | 55 | 18              | 0  | 27             | 30 |
|                             | Plains Zebra     | 50        | 50  | 73           | 55 | 18              | 0  | 27             | 30 |
|                             | Duiker           | 0         | 0   | 9            | 0  | 0               | 0  | 0              | 0  |
|                             | Giraffe          | 0         | 0   | 0            | 0  | 0               | 0  | 3              | 3  |
|                             | Greater Kudu     | 0         | 25  | 27           | 9  | 0               | 0  | 6              | 6  |
|                             | Steenbok         | 0         | 0   | 9            | 0  | 0               | 0  | 0              | 0  |
| Warthog                     | 0                | 0         | 0   | 0            | 0  | 0               | 0  | 0              |    |

**Table S2** Results of Logistic Mixed Effects models assessing correlation between observed clinical cases and predicted model output  $Q_0$  including lags up to 8 weeks, rainy season, or precipitation, with animal ID as a random intercept. NDVI values were only included in the model for Makgadikgadi data as estimates of NDVI were not available prior to 2003. Effect estimate is per standard deviation in  $Q_0$  due to scaling. Significance indicated by: \*  $P < 0.05$ , \*\*  $P < 0.01$ , \*\*\*  $P < 0.0001$ .

| Location                                             | Model term                                      | AIC                     | Estimate (Std. Error) | Wald $z^2$ |
|------------------------------------------------------|-------------------------------------------------|-------------------------|-----------------------|------------|
| Makgadikgadi (3570 observations of 1118 individuals) | null (random intercept)                         | 3506.3                  |                       |            |
|                                                      | $Q_0$                                           | 3485.8                  | 0.16516 (0.03501)     | 4.717***   |
|                                                      | $Q_0$ lag 1                                     | 3491.2                  | 0.15046 (0.03652)     | 4.12***    |
|                                                      | $Q_0$ lag 2                                     | 3496.9                  | 0.13437 (0.0398)      | 3.376***   |
|                                                      | $Q_0$ lag 3                                     | 3501.4                  | 0.11878 (0.04527)     | 2.624**    |
|                                                      | $Q_0$ lag 4                                     | 3507.0                  | 0.05531 (0.04832)     | 1.145      |
|                                                      | $Q_0$ lag 5                                     | 3506.6                  | -0.06824 (0.05297)    | 0.198      |
|                                                      | $Q_0$ lag 6                                     | 3490.1                  | -0.22601 (0.05420)    | -4.17***   |
|                                                      | $Q_0$ lag 7                                     | 3483.1                  | -0.24183 (0.04933)    | -4.902***  |
|                                                      | $Q_0$ lag 8                                     | 3476.5                  | -0.25344 (0.04595)    | -5.516***  |
|                                                      | $Q_0$ without NDVI                              | 3489.5                  | 0.14848 (0.03441)     | 4.315***   |
|                                                      | season                                          | 3507.4                  | -0.10094 (0.10600)    | -0.952     |
|                                                      | precipitation                                   | 3506.3                  | -0.01549 (0.01122)    | -1.38      |
| Emalahleni (20053 observations of 939 individuals)   | null (random intercept)                         | 17977.8                 |                       |            |
|                                                      | $Q_0$                                           | 17943.0                 | -0.11800 (0.01960)    | -6.02***   |
|                                                      | $Q_0$ lag 1                                     | 17970.1                 | -0.06037 (0.01949)    | -3.10***   |
|                                                      | $Q_0$ lag 2                                     | 17979.7                 | 0.00545 (0.019412)    | 0.28       |
|                                                      | $Q_0$ lag 3                                     | 17966.3                 | 0.06992 (0.01901)     | 3.68***    |
|                                                      | $Q_0$ lag 4                                     | 17940.6                 | 0.11894 (0.01897)     | 6.27***    |
|                                                      | $Q_0$ lag 5                                     | 17882.5                 | 0.18497 (0.01874)     | 9.87***    |
|                                                      | $Q_0$ lag 6                                     | 17816.5                 | 0.23851 (0.01869)     | 12.76***   |
|                                                      | $Q_0$ lag 7                                     | 17764.6                 | 0.27422 (0.01875)     | 14.62***   |
|                                                      | $Q_0$ lag 8                                     | 17721.1                 | 0.30023 (0.01874)     | 16.02***   |
|                                                      | season                                          | 17642.7                 | 0.73234 (0.04034)     | 18.15***   |
|                                                      | precipitation                                   | 17933.0                 | 0.018924 (0.002698)   | 7.01***    |
|                                                      | Ermelo (14605 observations of 1729 individuals) | null (random intercept) | 6653.2                |            |
| $Q_0$                                                |                                                 | 6600.9                  | -0.25602 (0.03569)    | -7.17***   |
| $Q_0$ lag 1                                          |                                                 | 6619.0                  | -0.20715 (0.03511)    | -5.90***   |
| $Q_0$ lag 2                                          |                                                 | 6625.7                  | -0.18644 (0.03486)    | -5.35***   |
| $Q_0$ lag 3                                          |                                                 | 6641.8                  | -0.12447 (0.03427)    | -3.63***   |
| $Q_0$ lag 4                                          |                                                 | 6632.1                  | -0.16281 (0.03431)    | -4.75***   |
| $Q_0$ lag 5                                          |                                                 | 6633.2                  | -0.16690 (0.03595)    | -4.64***   |
| $Q_0$ lag 6                                          |                                                 | 6638.2                  | -0.15032 (0.03667)    | -4.10***   |
| $Q_0$ lag 7                                          |                                                 | 6655.0                  | -0.01342 (0.03643)    | -0.37      |
| $Q_0$ lag 8                                          |                                                 | 6653.7                  | 0.04551 (0.03778)     | 1.2        |
| season                                               |                                                 | 6633.5                  | 0.40927 (0.09038)     | 4.53***    |
| precipitation                                        |                                                 | 6653.8                  | 0.003378 (0.002856)   | 0.237      |

**Table S3** Proportion of total worm populations from local and distant region under migration scenarios. Scenarios include a primary stationary host, plus a second host which either does not migrate, or has fixed-month or precipitation-driven migration. Proportions of the total worm populations are presented for each of the two hosts in each simulation, with the burden of the migratory host divided by source location (local or distant to West or East reference indicated by columns). These results are shown for three lengths of worm lifespan (subcolumns).

| Migration scenario | Host (Parasite Source) | Proportion of total burden (2003-2014) |        |        |        |        |        |
|--------------------|------------------------|----------------------------------------|--------|--------|--------|--------|--------|
|                    |                        | West                                   |        |        | East   |        |        |
|                    | worm lifespan (days)   | 55                                     | 14     | 100    | 55     | 14     | 100    |
| Month              | Stationary             | 0.663                                  | 0.691  | 0.638  | 0.673  | 0.646  | 0.702  |
|                    | Migratory (Local)      | 0.176                                  | 0.175  | 0.174  | 0.222  | 0.245  | 0.195  |
|                    | Migratory (Distant)    | 0.161                                  | 0.134  | 0.188  | 0.105  | 0.109  | 0.103  |
| Precipitation      | Stationary             | 0.657                                  | 0.661  | 0.655  | 0.735  | 0.734  | 0.736  |
|                    | Migratory (Local)      | 0.273                                  | 0.282  | 0.269  | 0.186  | 0.199  | 0.179  |
|                    | Migratory (Distant)    | 0.0696                                 | 0.0575 | 0.0765 | 0.0789 | 0.0673 | 0.0850 |
| None               | Stationary 1           | 0.5                                    | 0.5    | 0.5    | 0.5    | 0.5    | 0.5    |
|                    | Stationary 2           | 0.5                                    | 0.5    | 0.5    | 0.5    | 0.5    | 0.5    |

## Supplementary Figures

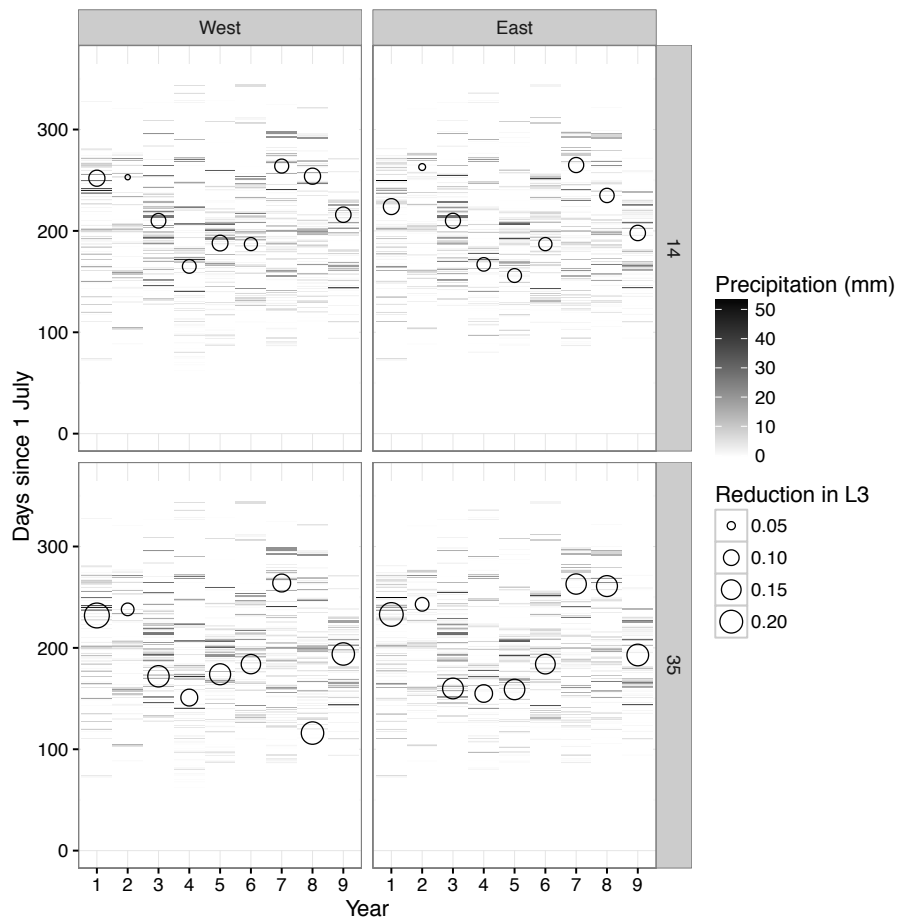

**Fig. S1** Percent reduction in  $L_3$  on herbage due to 14 day and 35 day treatments on west and east sides of the park in each simulation year (July 2003-June 2012), with years beginning 1 July (circles show optimal treatment date within the year, size scales with proportion of  $L_3$  removed), and daily rainfall in mm (horizontal lines).

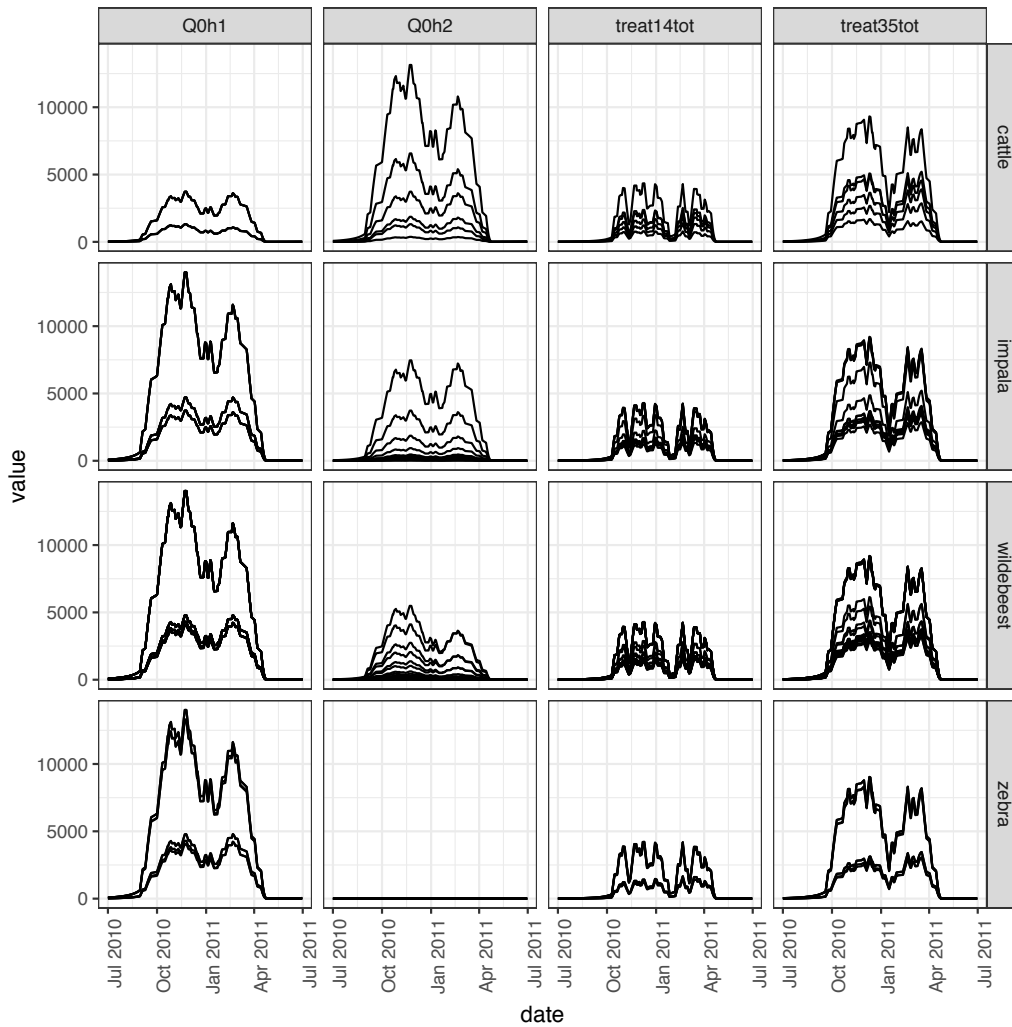

**Fig. S2** Model output for realistic scenarios in the east, showing one representative year. Lines represent alternative parameterizations as presented in Table 2. Columns are model outputs, Q0h1 is  $Q_0$  of the primary host, Q0h2 is  $Q_0$  in the second host, treat14tot is the reduction in total  $Q_0$  (Q0h1 + Q0h2) due to treatment on a given day, for treatment lasting 14 days and treat35tot is the same for treatment lasting 35 days.

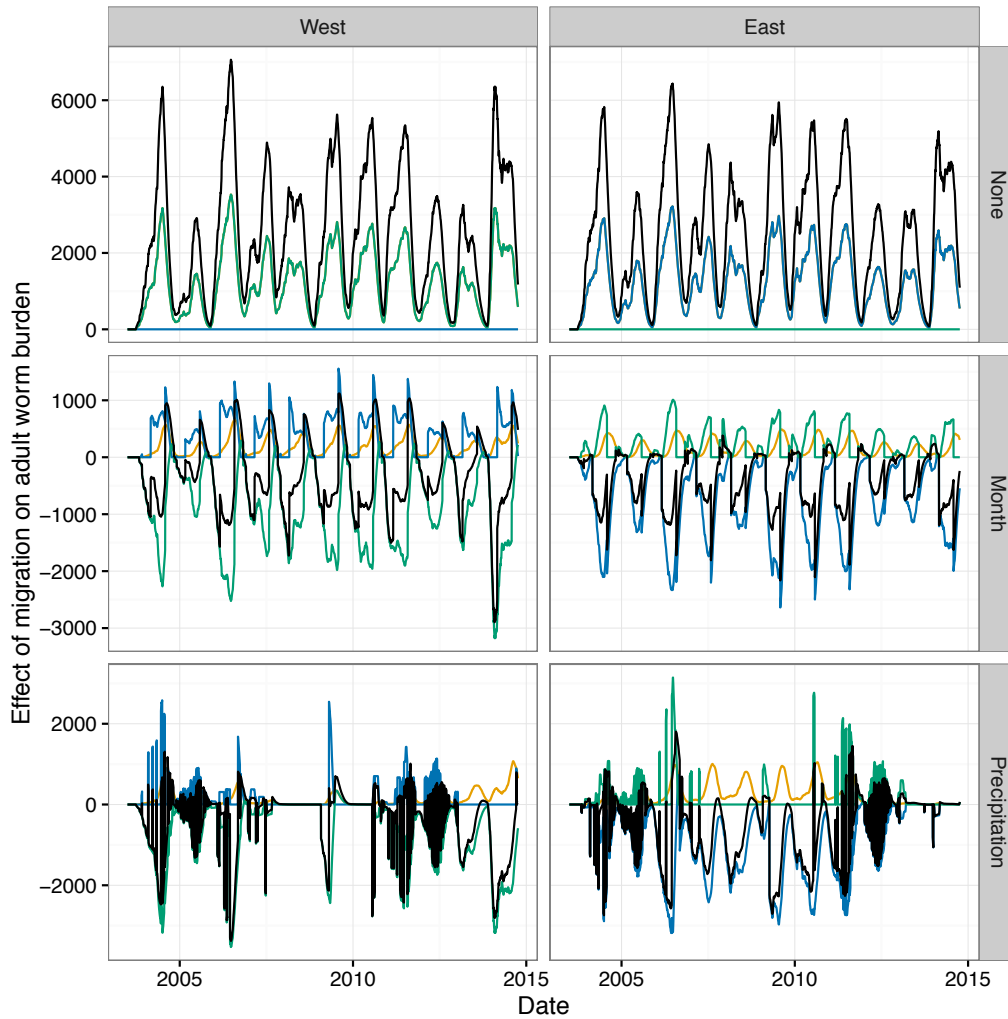

**Fig. S3** Simulated adult worm burden by location (columns) and migration scenario (rows) over time, where establishment rate ( $\epsilon$ ) for both hosts is 0.5, density ( $\rho$ ) for both hosts is 1, and lifespan of the adult worm ( $f$ ) is 55 days. First row (“None”) shows baseline scenario with no migration, while bottom two rows show the daily difference between burden for each host compared to no migration (top row) scenario. Black line, total burden in all hosts; gold line, burden in primary (non-migratory) host, blue line, burden in migratory host acquired in the east; green line, burden in migratory host acquired in the west. In the no migration scenario, the burden in the primary host is equal to the burden in the migratory host, therefore the gold line is not visible.
